# Supplementary material
Source: PubMed Central journal article supplement (PMC1726246)
Supplement: emermedj_20_6_505__1.pdf [file emermedj_20_6_505__1.pdf]

## **Web-only Appendix**

### **Questionnaire**

Please could you complete the questionnaire below regarding the usual treatment and immediate care and advice of ligamentous ankle injury in your department at the first presentation. This does not include any treatment that may be initiated at a return visit.

**Thank you**

**Scenario:** A 40 year old rugby player has just injured his ankle today. It is bruised and very swollen over the lateral ligament. There is no apparent instability but any ankle movement is very painful. He cannot weight bear. The x-ray shows no abnormality.

|                                                                                    | <b>most cases</b> | <b>Selected</b> | <b>Rarely</b>  | <b>Never</b> | <b>Comments</b> |
|------------------------------------------------------------------------------------|-------------------|-----------------|----------------|--------------|-----------------|
|                                                                                    | <b>&gt;90%</b>    | <b>cases</b>    | <b>&lt;10%</b> |              |                 |
| Ice                                                                                |                   |                 |                |              |                 |
| Elevation                                                                          |                   |                 |                |              |                 |
| Tubigrip                                                                           |                   |                 |                |              |                 |
| Crutches                                                                           |                   |                 |                |              |                 |
| Walking Stick                                                                      |                   |                 |                |              |                 |
| Absolute Rest                                                                      |                   |                 |                |              |                 |
| Ankle exercises:                                                                   |                   |                 |                |              |                 |
| Commence weight bearing                                                            |                   |                 |                |              |                 |
| POP cast                                                                           |                   |                 |                |              |                 |
| Bledsoe type boot                                                                  |                   |                 |                |              |                 |
| Flexible cast e.g. Scotch wrap                                                     |                   |                 |                |              |                 |
| Elastoplast strapping                                                              |                   |                 |                |              |                 |
| Crepe Bandage                                                                      |                   |                 |                |              |                 |
| Physiotherapy                                                                      |                   |                 |                |              |                 |
| NSAID tablets                                                                      |                   |                 |                |              |                 |
| NSAID gel                                                                          |                   |                 |                |              |                 |
| Aircast type splint                                                                |                   |                 |                |              |                 |
| Do you use MRI scans to guide your early treatment?                                |                   |                 |                |              |                 |
| If you advise rest, how long do you usually suggest?                               |                   |                 |                |              |                 |
| When do you advise to start weight-bearing                                         |                   |                 |                |              |                 |
| When do you advise to start non-weight bearing exercises                           |                   |                 |                |              |                 |
| If you use any other type of strapping or support, please specify                  |                   |                 |                |              |                 |
| If you use POP, boot or ankle brace, at what stage do you fit it                   |                   |                 |                |              |                 |
| If you have an advice leaflet or written guidelines, please could you send a copy. |                   |                 |                |              |                 |

## **FOLLOW UP**

---

|                                        | <b>most cases</b> | <b>selected</b> | <b>rarely</b>  | <b>never / not</b> |
|----------------------------------------|-------------------|-----------------|----------------|--------------------|
|                                        | <b>&gt;90%</b>    |                 | <b>&lt;10%</b> | <b>available</b>   |
| A&E clinic                             |                   |                 |                |                    |
| General fracture/orthopaedic<br>clinic |                   |                 |                |                    |
| physio run clinic                      |                   |                 |                |                    |
| sports clinic                          |                   |                 |                |                    |
| specialist ankle clinic                |                   |                 |                |                    |

---
